# Supplementary material
Source: PubMed Central journal article supplement (PMC5893401)
Supplement: NIHMS940374-supplement-1.pdf [file NIHMS940374-supplement-1.pdf]

| miRNA ID       | Chronic SIV-infected (n=12) |      |      |      |      |      |      |          |           |           |           |      | Uninfected Controls (n=8) |          |          |          |      |      |      |      | Fold Change | P Value  |
|----------------|-----------------------------|------|------|------|------|------|------|----------|-----------|-----------|-----------|------|---------------------------|----------|----------|----------|------|------|------|------|-------------|----------|
|                | FE24                        | FT11 | HN15 | HI68 | HG45 | HB31 | GA19 | HD08-90D | HH07-180D | HF54-180D | HR42-180D | HV48 | HD08-Pre                  | HH07-Pre | HF54-Pre | HR42-Pre | HT73 | IH95 | EJ34 | IT05 |             |          |
| hsa-miR-194    | 15.4                        | 15.8 | 16.9 | 17.7 | 17.5 | 16.8 | 17.4 | 15.8     | 14.3      | 16.3      | 15.8      | 40   | 15.9                      | 15.0     | 13.8     | 13.6     | 15.4 | 14.4 | 13.3 | 13.8 | -8.3        | 2.98E-03 |
| hsa-miR-23b    | 21.4                        | 21.0 | 21.3 | 21.9 | 22.0 | 22.2 | 40   | 21.2     | 20.6      | 21.0      | 20.5      | 19.6 | 20.3                      | 19.5     | 19.8     | 19.0     | 19.4 | 19.6 | 18.6 | 18.0 | -6.1        | 2.16E-03 |
| hsa-miR-107    | 24.0                        | 24.9 | 25.3 | 25.3 | 25.4 | 26.2 | 25.3 | 24.1     | 23.1      | 24.8      | 23.1      | 40   | 24.4                      | 23.6     | 22.7     | 22.3     | 22.9 | 22.2 | 22.7 | 22.0 | -4.8        | 9.56E-03 |
| hsa-miR-28-3p  | 18.0                        | 19.1 | 20.9 | 20.3 | 20.3 | 20.5 | 20.8 | 19.6     | 18.6      | 18.9      | 19.5      | 19.2 | 19.3                      | 18.4     | 14.1     | 16.8     | 18.7 | 16.8 | 14.7 | 15.9 | -3.8        | 2.98E-03 |
| hsa-miR-10b    | 21.7                        | 18.8 | 21.7 | 20.7 | 20.7 | 21.7 | 22.2 | 21.7     | 19.8      | 19.9      | 18.5      | 21.8 | 19.8                      | 17.8     | 18.1     | 16.9     | 18.6 | 18.7 | 19.2 | 17.0 | -3.2        | 5.49E-03 |
| hsa-miR-342-3p | 19.8                        | 20.6 | 20.9 | 20.5 | 22.3 | 24.6 | 21.9 | 22.0     | 19.7      | 19.8      | 20.0      | 20.6 | 20.5                      | 19.9     | 18.6     | 18.3     | 18.9 | 18.2 | 17.6 | 18.1 | -2.7        | 7.30E-03 |
| hsa-miR-181c   | 25.4                        | 26.7 | 26.5 | 27.5 | 29.7 | 28.5 | 27.5 | 27.5     | 26.7      | 26.3      | 27.1      | 27.6 | 27.0                      | 25.2     | 25.0     | 24.9     | 25.6 | 23.6 | 24.4 | 25.3 | -2.4        | 7.30E-03 |
| hsa-miR-28     | 19.6                        | 19.6 | 21.2 | 21.4 | 21.0 | 20.8 | 21.0 | 19.6     | 18.5      | 19.8      | 18.9      | 22.2 | 19.6                      | 18.4     | 17.8     | 17.8     | 19.2 | 18.0 | 17.5 | 17.2 | -2.4        | 4.76E-04 |
| hsa-miR-196b   | 20.8                        | 19.8 | 21.8 | 22.0 | 21.4 | 21.6 | 21.3 | 19.6     | 17.7      | 20.8      | 19.9      | 24.2 | 20.7                      | 19.5     | 18.1     | 18.5     | 19.8 | 17.8 | 17.7 | 18.8 | -2.3        | 9.56E-03 |
| hsa-miR-150    | 16.3                        | 18.4 | 18.7 | 18.0 | 18.3 | 20.3 | 19.9 | 18.8     | 16.7      | 16.7      | 17.2      | 19.1 | 17.7                      | 16.6     | 15.8     | 15.4     | 17.0 | 15.0 | 15.4 | 16.5 | -2.3        | 9.56E-03 |
| hsa-miR-328    | 25.6                        | 26.2 | 25.6 | 24.8 | 25.7 | 26.8 | 27.8 | 25.3     | 24.8      | 24.0      | 25.3      | 23.6 | 24.6                      | 24.3     | 23.7     | 23.8     | 23.4 | 22.6 | 22.8 | 22.4 | -2.2        | 0.01586  |
| hsa-miR-10a    | 18.2                        | 17.4 | 18.8 | 18.7 | 19.2 | 18.8 | 19.8 | 16.8     | 16.0      | 18.1      | 16.9      | 18.8 | 17.3                      | 16.5     | 15.4     | 15.7     | 16.8 | 16.1 | 15.4 | 15.8 | -2.2        | 4.76E-04 |
| hsa-miR-181a   | 20.2                        | 21.6 | 22.0 | 22.0 | 21.3 | 22.7 | 22.7 | 21.1     | 19.7      | 20.5      | 20.2      | 21.8 | 20.8                      | 19.8     | 18.8     | 19.4     | 20.5 | 18.5 | 18.8 | 18.7 | -2.0        | 2.98E-03 |
| hsa-miR-532-3p | 21.4                        | 22.1 | 23.0 | 23.2 | 22.6 | 23.6 | 24.1 | 22.0     | 21.6      | 22.6      | 21.9      | 23.1 | 22.0                      | 21.2     | 20.5     | 19.9     | 21.5 | 21.0 | 19.9 | 19.8 | -2.0        | 3.02E-04 |
| hsa-miR-148a   | 18.7                        | 19.5 | 20.8 | 21.5 | 20.8 | 20.8 | 21.7 | 20.4     | 19.6      | 20.5      | 19.8      | 22.1 | 19.4                      | 18.7     | 18.9     | 17.8     | 18.9 | 18.7 | 18.6 | 18.5 | -2.0        | 5.49E-03 |
| hsa-miR-339-5p | 20.8                        | 21.0 | 21.6 | 21.8 | 22.3 | 22.5 | 22.1 | 20.6     | 20.6      | 21.0      | 20.8      | 21.0 | 21.0                      | 19.7     | 19.9     | 18.7     | 19.8 | 19.2 | 19.3 | 18.5 | -2.0        | 2.98E-03 |
| hsa-miR-378    | 25.7                        | 24.6 | 26.7 | 26.1 | 26.4 | 26.3 | 27.8 | 24.8     | 23.9      | 26.6      | 25.0      | 24.7 | 23.9                      | 24.4     | 23.7     | 23.8     | 24.5 | 23.9 | 23.5 | 23.4 | -1.9        | 9.56E-03 |
| hsa-miR-98     | 21.9                        | 21.1 | 22.8 | 22.6 | 22.7 | 23.1 | 22.7 | 21.0     | 20.2      | 21.8      | 21.7      | 21.4 | 21.1                      | 20.0     | 20.0     | 20.2     | 20.7 | 19.4 | 20.4 | 19.3 | -1.9        | 2.98E-03 |
| hsa-miR-365    | 25.8                        | 25.1 | 24.4 | 25.2 | 25.0 | 25.4 | 24.6 | 23.9     | 23.5      | 23.7      | 23.1      | 24.1 | 23.1                      | 22.6     | 22.7     | 23.2     | 23.9 | 22.9 | 21.3 | 22.6 | -1.8        | 1.24E-02 |
| hsa-miR-26a    | 15.9                        | 16.8 | 18.5 | 17.8 | 17.7 | 18.3 | 17.8 | 16.7     | 15.8      | 16.9      | 16.5      | 18.4 | 17.4                      | 15.8     | 15.3     | 15.1     | 16.3 | 15.1 | 14.4 | 15.3 | -1.8        | 5.49E-03 |
| hsa-miR-15b    | 17.3                        | 18.8 | 19.0 | 19.5 | 18.4 | 19.5 | 20.5 | 18.2     | 17.3      | 18.7      | 17.5      | 20.6 | 18.2                      | 17.4     | 16.8     | 16.8     | 18.0 | 16.8 | 16.6 | 16.3 | -1.8        | 7.30E-03 |
| hsa-let-7f     | 20.1                        | 20.7 | 21.6 | 22.3 | 21.3 | 21.6 | 21.2 | 20.7     | 20.0      | 20.8      | 19.8      | 22.8 | 20.7                      | 19.8     | 19.3     | 18.9     | 20.4 | 18.8 | 18.6 | 18.7 | -1.7        | 7.30E-03 |
| hsa-miR-30b    | 15.9                        | 16.4 | 17.4 | 17.8 | 16.9 | 17.4 | 17.5 | 16.2     | 15.3      | 16.7      | 15.7      | 17.7 | 16.3                      | 15.0     | 14.8     | 14.9     | 16.2 | 14.8 | 14.6 | 14.5 | -1.7        | 3.02E-04 |
| hsa-miR-26b    | 18.3                        | 18.8 | 19.8 | 19.9 | 19.4 | 19.9 | 19.8 | 18.9     | 17.8      | 19.0      | 18.4      | 20.9 | 19.4                      | 18.1     | 17.5     | 16.9     | 18.3 | 17.0 | 17.0 | 17.1 | -1.6        | 0.01586  |
| hsa-miR-30c    | 16.1                        | 16.8 | 17.4 | 17.8 | 17.0 | 17.8 | 17.7 | 16.3     | 15.2      | 16.6      | 15.8      | 17.8 | 16.7                      | 15.5     | 14.8     | 15.2     | 16.4 | 15.3 | 14.6 | 14.7 | -1.5        | 4.10E-03 |
| hsa-miR-324-5p | 22.2                        | 23.1 | 23.3 | 22.9 | 23.4 | 23.4 | 23.4 | 22.7     | 21.5      | 22.8      | 21.8      | 23.4 | 22.7                      | 21.3     | 21.2     | 21.7     | 22.3 | 21.3 | 20.8 | 20.7 | -1.4        | 5.49E-03 |
| hsa-miR-185    | 22.7                        | 24.0 | 22.8 | 23.9 | 23.0 | 24.1 | 23.1 | 22.9     | 21.8      | 23.0      | 22.8      | 23.8 | 24.5                      | 22.4     | 22.0     | 23.4     | 24.5 | 23.2 | 22.0 | 23.8 | 1.9         | 2.98E-03 |
| hsa-miR-127    | 23.6                        | 24.9 | 22.8 | 23.8 | 24.3 | 24.8 | 22.8 | 23.8     | 23.3      | 22.7      | 23.6      | 24.8 | 24.8                      | 23.8     | 24.2     | 24.0     | 24.2 | 23.4 | 22.1 | 24.7 | 2.0         | 0.01586  |
| hsa-miR-337-5p | 27.4                        | 27.0 | 27.4 | 27.4 | 27.1 | 27.4 | 27.0 | 24.7     | 27.2      | 26.4      | 26.1      | 25.2 | 29.8                      | 28.0     | 27.9     | 29.6     | 16.1 | 27.9 | 27.0 | 29.2 | 2.1         | 4.10E-03 |
| hsa-miR-204    | 23.7                        | 24.9 | 24.8 | 24.4 | 22.8 | 25.6 | 23.8 | 23.3     | 23.7      | 23.6      | 23.3      | 23.8 | 25.2                      | 22.8     | 24.8     | 24.0     | 25.4 | 24.3 | 22.8 | 24.5 | 2.2         | 5.49E-03 |
| hsa-miR-425*   | 24.7                        | 25.6 | 24.9 | 23.8 | 24.4 | 24.3 | 24.9 | 24.7     | 23.4      | 26.5      | 24.6      | 22.9 | 25.5                      | 24.2     | 24.7     | 25.6     | 25.1 | 25.7 | 23.6 | 25.7 | 2.4         | 7.30E-03 |
| hsa-miR-486    | 21.8                        | 27.6 | 22.6 | 24.0 | 21.7 | 22.8 | 24.6 | 23.3     | 22.2      | 21.8      | 22.0      | 23.4 | 23.1                      | 23.6     | 23.1     | 24.3     | 24.0 | 24.9 | 22.7 | 23.4 | 2.6         | 4.10E-03 |
| hsa-miR-212    | 24.3                        | 24.6 | 23.3 | 23.4 | 24.0 | 22.8 | 23.8 | 23.3     | 23.1      | 24.3      | 24.5      | 23.0 | 23.8                      | 25.1     | 22.2     | 24.8     | 24.1 | 24.1 | 25.5 | 24.8 | 2.7         | 1.24E-02 |
| hsa-miR-143    | 18.6                        | 21.0 | 19.2 | 19.6 | 18.5 | 19.6 | 16.8 | 18.9     | 18.9      | 17.3      | 19.5      | 17.8 | 19.4                      | 17.0     | 19.1     | 21.3     | 21.3 | 18.9 | 19.0 | 20.2 | 3.0         | 0.01586  |
| hsa-miR-19b    | 14.5                        | 16.7 | 14.0 | 14.7 | 13.8 | 14.9 | 14.6 | 13.9     | 12.8      | 14.1      | 13.5      | 15.8 | 14.6                      | 13.2     | 13.1     | 17.7     | 18.2 | 15.9 | 13.4 | 15.3 | 3.0         | 1.24E-02 |
| hsa-miR-200a*  | 21.8                        | 21.8 | 22.2 | 21.9 | 22.8 | 22.3 | 23.6 | 22.2     | 20.9      | 22.8      | 21.9      | 20.6 | 22.8                      | 21.2     | 21.2     | 23.8     | 23.5 | 24.6 | 22.3 | 23.2 | 3.1         | 2.98E-03 |
| hsa-miR-886-5p | 24.8                        | 23.8 | 24.7 | 22.7 | 24.5 | 23.0 | 22.7 | 22.4     | 22.3      | 26.0      | 24.9      | 26.1 | 25.5                      | 25.1     | 25.7     | 23.6     | 24.7 | 23.7 | 26.7 | 23.7 | 3.2         | 0.01586  |
| hsa-miR-455    | 24.8                        | 24.9 | 25.9 | 26.9 | 25.5 | 27.1 | 24.5 | 25.8     | 28.2      | 24.4      | 27.3      | 26.8 | 27.5                      | 25.8     | 27.9     | 26.7     | 27.9 | 25.1 | 26.6 | 27.7 | 3.3         | 1.24E-02 |
| hsa-miR-130a   | 21.7                        | 22.9 | 22.7 | 22.3 | 21.8 | 23.5 | 20.8 | 21.8     | 22.6      | 21.7      | 22.6      | 21.6 | 23.1                      | 21.4     | 23.2     | 24.3     | 24.6 | 23.0 | 22.0 | 23.5 | 3.6         | 4.76E-04 |
| hsa-miR-24     | 15.7                        | 18.7 | 15.7 | 15.1 | 15.3 | 16.0 | 15.7 | 15.4     | 14.8      | 14.7      | 14.9      | 15.8 | 15.8                      | 14.5     | 14.0     | 19.8     | 19.8 | 18.4 | 14.5 | 16.9 | 3.8         | 0.01586  |
| hsa-miR-106a   | 14.7                        | 17.8 | 15.3 | 15.2 | 14.8 | 14.8 | 15.5 | 14.5     | 13.7      | 15.6      | 14.1      | 16.7 | 15.6                      | 14.3     | 13.9     | 19.9     | 19.6 | 17.9 | 14.5 | 16.5 | 4.5         | 1.52E-03 |
| hsa-miR-1255B  | 27.5                        | 26.7 | 26.3 | 24.1 | 25.4 | 27.2 | 25.6 | 25.9     | 24.5      | 40        | 25.5      | 28.0 | 26.7                      | 27.1     | 27.1     | 27.0     | 27.8 | 40   | 27.3 | 26.2 | 4.9         | 7.30E-03 |
| hsa-miR-1274A  | 18.4                        | 16.8 | 16.4 | 15.9 | 17.9 | 16.7 | 15.1 | 15.3     | 15.6      | 21.6      | 16.3      | 17.2 | 18.2                      | 16.3     | 16.7     | 21.4     | 19.4 | 20.9 | 16.2 | 18.1 | 5.0         | 2.98E-03 |
| hsa-miR-31     | 18.0                        | 27.0 | 24.0 | 25.5 | 24.6 | 23.8 | 23.1 | 25.3     | 24.0      | 23.4      | 22.2      | 25.8 | 28.2                      | 24.8     | 25.8     | 25.0     | 24.6 | 25.4 | 24.0 | 25.6 | 5.2         | 2.98E-03 |
| hsa-miR-452    | 26.6                        | 26.6 | 24.8 | 26.7 | 24.6 | 26.8 | 25.0 | 25.8     | 26.8      | 24.8      | 26.8      | 27.0 | 29.2                      | 25.5     | 29.1     | 28.6     | 28.3 | 26.4 | 26.1 | 28.1 | 5.6         | 7.14E-04 |
| hsa-miR-224    | 26.1                        | 28.0 | 26.3 | 28.6 | 26.5 | 28.4 | 26.0 | 26.1     | 27.5      | 25.7      | 28.2      | 25.5 | 28.9                      | 25.6     | 27.9     | 28.7     | 40   | 26.6 | 26.6 | 27.1 | 7.3         | 0.01586  |

MiRNA species originating from the opposite arm of the precursor are denoted with an asterisk (\*). Pre- Preinfection

Downregulated miRNAs, Upregulated miRNAs

Supplemental Table 1. Raw  $C_T$ , fold change and P values for all differentially expressed miRNAs in Colonic Epithelium of Chronically SIV-infected rhesus macaques.

| Gene Symbol | Gene Name                                                             | Fold Change | P value | Predicted Targeting miRNA (Upregulated)           |
|-------------|-----------------------------------------------------------------------|-------------|---------|---------------------------------------------------|
|             | <b>Epithelial barrier function</b>                                    |             |         |                                                   |
| NT5E        | 5'-nucleotidase, ecto (CD73)                                          | -8.3        | 0.0014  | miR-185, -212, -204, -224                         |
| ABCB1       | ATP-binding cassette, sub-family B, member 1                          | -8.2        | 0.0219  | miR-224                                           |
| OCLN        | Occludin                                                              | -2.6        | 0.0021  | miR-212, -455, -486, -204, -224, -24              |
| PPARG       | Peroxisome proliferator-activated receptor gamma                      | -2.3        | 0.0293  | miR-130a, -24                                     |
| PPARGC1A    | Peroxisome proliferator-activated receptor gamma, coactivator 1 alpha | -4.1        | 0.0144  | miR-130a, -204, -19b, -452                        |
| PARD3       | Par-3 family cell polarity regulator                                  | -2.3        | 0.0092  | miR-212, -130a, -143, -185                        |
| CFTR        | Cystic fibrosis transmembrane conductance regulator                   | -3.6        | 0.0001  | miR-212                                           |
| ADORA3      | Adenosine A3 receptor                                                 | -1.8        | 0.0029  | miR-204, -185, -143                               |
| EDNRA       | Endothelin receptor type A                                            | -6.4        | 0.0011  | miR-212, -24, -224, -455                          |
| EDNRB       | Endothelin receptor type B                                            | -3.1        | 0.0043  | miR-455, -19b, -212, -24, -486                    |
| TFF2        | Trefoil factor 2                                                      | -3.0        | 0.0162  |                                                   |
| HNF4G       | Hepatocyte nuclear factor 4, gamma                                    | -1.8        | 0.0191  | miR-106a, -204, -224                              |
| HBP1        | High Mobility Group box transcription factor 1                        | -3.3        | 0.0032  | miR-130a, -106a, -19b                             |
| ARNT2       | Aryl hydrocarbon receptor nuclear translocator 2                      | -5.2        | 0.0035  | miR-24, -455, -185, -224                          |
| FN1         | Fibronectin 1                                                         | -5.8        | 0.0410  | miR-486, -130a                                    |
| ITGA8       | Integrin, alpha 8                                                     | -2.2        | 0.0267  | miR-455, -24, -224                                |
| TGFB3       | Transforming growth factor, beta receptor III                         | -2.2        | 0.0115  | miR-106a, -455, -19b, -24                         |
|             | <b>Oxidative injury/inflammation</b>                                  |             |         |                                                   |
| OXR1        | Oxidation resistance 1                                                | -2.4        | 0.0027  | miR-106a, -19b, -224                              |
| MEF2C       | Myocyte enhancer factor 2C                                            | -3.1        | 0.0234  | miR-212, -455, -19b, -204, -106a, -452            |
|             | <b>Intestinal stem cell growth/maintenance</b>                        |             |         |                                                   |
| PROM1       | Prominin 1                                                            | -6.9        | 0.0083  | miR-486, -19b                                     |
| RICTOR      | RPTOR independent companion of MTOR, complex 2                        | -3.0        | 0.0261  | miR-212, -19b, -204, -452                         |
| SOX6        | SRY (sex determining region Y)-box 6                                  | -2.9        | 0.012   | miR-212, -455, -19b, -204, -452, -143, -24        |
|             | <b>DNA damage repair</b>                                              |             |         |                                                   |
| RAD17       | RAD17 homolog (S. pombe)                                              | -2.8        | 0.0042  | miR-130a                                          |
| RAD50       | RAD50 homolog (S. cerevisiae)                                         | -2.2        | 0.0277  | miR-212, -106a, -185, -452, -24, -143             |
|             | <b>Wnt Signaling</b>                                                  |             |         |                                                   |
| APC         | Adenomatous polyposis coli                                            | -2.1        | 0.0333  | miR-24, -212                                      |
| TNIK        | TRAF2 and NCK interacting kinase                                      | -3.4        | 0.0003  | miR-31, -106a, -130a, -24, -452, -143, -204, -486 |
| DKK3        | Dickkopf 3                                                            | -2.0        | 0.0481  | -212, -130a, -19b, -224, -185                     |
|             | <b>Ion/water transport</b>                                            |             |         |                                                   |
| CA1         | Carbonic anhydrase 1                                                  | -37.7       | 0.0029  |                                                   |
| AQP8        | Aquaporin 8                                                           | -19.4       | 0.0363  |                                                   |
| BEST2       | Bestrophin 2                                                          | -6.6        | 0.0250  |                                                   |
|             | <b>Cell Survival</b>                                                  |             |         |                                                   |
| FASLG       | Fas ligand (TNF superfamily, member 6)                                | -4.2        | 0.0219  | miR-130a, -106a, -455, -24                        |
| AKT3        | v-akt murine thymoma viral oncogene homolog 3                         | -4.3        | 0.0006  | miR-212, -106a, -224, -455                        |
|             | <b>Miscellaneous Genes</b>                                            |             |         |                                                   |
| TNFAIP3     | Tumor necrosis factor, alpha-induced protein 3                        | -2.9        | 0.011   | miR-106a, -204                                    |

Supplemental Table 2. List of downregulated genes and their targeting miRNA/s in colonic epithelium of chronically SIV-infected rhesus macaques

| Gene Symbol | Gene Name                                                      | Fold Change | P value | Predicted Targeting miRNA/s (Downregulated miRNAs)                           |
|-------------|----------------------------------------------------------------|-------------|---------|------------------------------------------------------------------------------|
|             | <b><i>Interferon response genes</i></b>                        |             |         |                                                                              |
| MX1         | Myxovirus resistance 1, interferon-inducible protein p78       | 9.7         | 0.0011  | miR-26a/26b, -342-3p                                                         |
| MX2         | Myxovirus (influenza virus) resistance 2                       | 1.7         | 0.0249  | miR-15b, miR-107                                                             |
| IFI6        | Interferon, alpha-inducible protein 6                          | 8.8         | 0.015   |                                                                              |
| IFI27       | ISG12(c) protein-like                                          | 5.4         | 0.0100  |                                                                              |
| OAS2        | 2'-5'-oligoadenylate synthetase 2, 69/71kDa                    | 3.4         | 0.011   | miR-28, -339-5p, -26a/26b, -107                                              |
| LOC720763   | Interferon-induced transmembrane protein 3-like                | 3.1         | 0.0018  |                                                                              |
| IRF9        | Interferon regulatory factor 9                                 | 2.9         | 0.0001  |                                                                              |
|             | <b><i>Anti-microbial response</i></b>                          |             |         |                                                                              |
| ROAD-1      | Oral alpha defensin 1                                          | 8.5         | 0.0164  |                                                                              |
| MNP2        | Alpha-defensin 2                                               | 8.9         | 0.0091  |                                                                              |
| DEFA4       | Defensin, alpha 4, corticostatin                               | 10.5        | 0.0107  | miR-342-3p                                                                   |
| LOC574309   | Alpha-defensin 2 precursor                                     | 9.0         | 0.0230  |                                                                              |
| DEFB122     | Beta defensin 122                                              | 2.2         | 0.0018  |                                                                              |
| MUC2        | Mucin 2, oligomeric mucus/gel-forming                          | 2.2         | 0.0061  | miR-342-3p, -150, -15b                                                       |
|             | <b><i>Proinflammatory cytokine and chemokine signaling</i></b> |             |         |                                                                              |
| NLRP1       | NLR family, pyrin domain containing 1                          | 2.3         | 0.0340  | miR-15b, -107, -181a/181c, -532-3p, -342-3p                                  |
| NLRP7       | NLR family, pyrin domain containing 7                          | 2.6         | 0.0154  | miR-532-3p, -150, -339-5p                                                    |
| IL18BP      | interleukin 18 binding protein                                 | 1.7         | 0.0498  | miR-150, -148a, -532-3p, -342-3p                                             |
| TNF         | Tumor necrosis factor                                          | 2.6         | 0.0044  | miR-150, -532-3p                                                             |
| IL23R       | Interleukin 23 receptor                                        | 2.1         | 0.0002  | miR-150, -23b, -28                                                           |
| CCL24       | Chemokine (C-C motif) ligand 24                                | 1.7         | 0.0431  | miR-342-3p                                                                   |
| CX3CR1      | C-X3-C Motif Chemokine Receptor 1                              | 1.9         | 0.0029  | miR-15b, -28                                                                 |
| SOCS1       | Suppressor of cytokine signaling 1                             | 2.5         | 0.0009  | let-7f, -98-5p, -30b/30c,                                                    |
| PIAS3       | Protein inhibitor of activated STAT3                           | 2.0         | 0.0078  | miR-150, -532-3p, -181a/181c                                                 |
| FKBP4       | FK506 binding protein 4, 59kDa                                 | 3.9         | 0.0040  | miR-181a/181c, -150, -532-3p, -342-3p, miR-98, -324-5p, -23b                 |
| AHR         | Aryl hydrocarbon receptor                                      | 1.9         | 0.0077  | miR-196b, miR-23b                                                            |
| TIMP3       | TIMP metalloproteinase inhibitor 3                             | 1.9         | 0.0003  | miR-181a/181c, -30b/30c, -10a/10b, -342-3p, -196b, -194                      |
| S100B       | S100 calcium binding protein B                                 | 2.5         | 0.0441  | miR-324-5p, -148a                                                            |
|             | <b><i>Cellular apoptosis</i></b>                               |             |         |                                                                              |
| BAK1        | BCL2-antagonist/killer 1                                       | 1.6         | 0.0152  | miR-150, -107, -23b, -28, -532-3p, -342-3p                                   |
| BCL2L11     | BCL2-like 11 (apoptosis facilitator)                           | 1.8         | 0.0121  | miR-181a/181c, -30b/30c, -148a, -107, -339-5p, -324-5p, -10a/10b, -15b, -23b |
|             | <b><i>Intestinal stem cell growth/maintenance</i></b>          |             |         |                                                                              |
| BCL9        | B-cell CLL/lymphoma 9                                          | 2.5         | 0.0016  | miR-181a/181c, -30b/30c, -532-3p, -324-5p                                    |
| WISP1       | WNT1 inducible signaling pathway protein 1                     | 3.0         | 0.02    | miR-26a/26b, -23b, -181a/181c, -28, -532-3p, -339-5p                         |
| SMAD3       | SMAD family member 3                                           | 4.5         | 0.0148  | miR-181a/181c, -150, -23b, -28, -342-3p                                      |
| SNAI1       | Snail homolog 1 (Drosophila)                                   | 5.4         | 0.0223  | miR-30b/30c, -339-5p                                                         |
|             | <b><i>DNA damage response</i></b>                              |             |         |                                                                              |
| OGG1        | 8-oxoguanine DNA glycosylase                                   | 1.9         | 0.0270  | miR-150, -532-3p, -98, let-7f, -15b                                          |
| FANCG       | Fanconi anemia, complementation group G                        | 2.3         | 0.0000  | miR-23b                                                                      |
| RAD23B      | RAD23 homolog B (S. cerevisiae)                                | 1.7         | 0.0140  | miR-181a/181c, -30b/30c, -150, -532-3p, -342-3p, -196b, -23b                 |
| GADD45G     | Growth arrest and DNA-damage-inducible, gamma                  | 3.9         | 0.0112  | miR-26a/26b, -107, -15b, -28, -181a/181c                                     |
|             | <b><i>Cellular/Oxidative stress protection</i></b>             |             |         |                                                                              |
| CLU         | Clusterin                                                      | 5.1         | 0.0295  | miR-532-3p, -194                                                             |
| HMOX1       | Heme oxygenase (decycling) 1                                   | 3.6         | 0.0035  | miR-26a/26b                                                                  |
| DDIT3       | DNA-damage-inducible transcript 3                              | 2.9         | 0.0033  |                                                                              |
| SRXN1       | Sulfiredoxin 1                                                 | 2.3         | 0.0091  | miR-532-3p, -148a, -28-3p, -107, -181a/181c                                  |
|             | <b><i>Microbial Translocation</i></b>                          |             |         |                                                                              |
| DUOX1       | Dual oxidase 1                                                 | 4.3         | 0.0151  |                                                                              |
| LCN2        | Lipocalin 2                                                    | 8.7         | 0.0100  | miR-150, -28-5p                                                              |
|             | <b><i>Miscellaneous genes</i></b>                              |             |         |                                                                              |
| AIPL1       | Aryl hydrocarbon receptor interacting protein-like 1           | 2.2         | 0.0100  | miR-150, let-7f, -98                                                         |

Supplemental Table 3. List of Upregulated genes and their targeting miRNA/s in colonic epithelium of chronically SIV-infected rhesus macaques.
